# Supplementary material
Source: PubMed Central journal article supplement (PMC2726381)
Supplement: 0900210106_0900210106SI.pdf [file 0900210106_0900210106SI.pdf]

# Supporting Information

Crist et al. 10.1073/pnas.0900210106

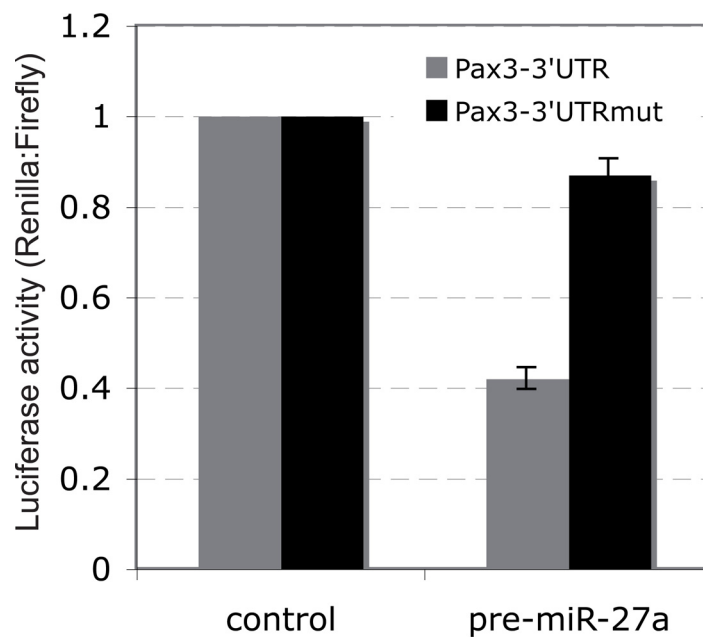

**Fig. S1.** Transfection of 293 cells, expressing the psicheck-2 luciferase vector containing the Pax3 3'UTR downstream of the Renilla luciferase (R. luc) sequence, with miR-27a precursors, resulted in reduced R. luc activity that was lost upon mutation of the miR-27 target site (Pax3-3'UTRmut).

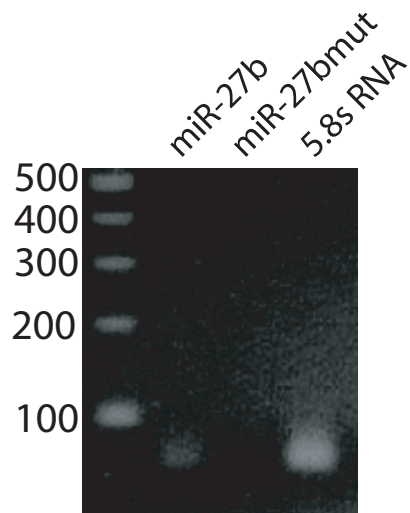

**Fig. S2.** Detection of miR-27b from 293 cells by reverse transcription followed by PCR was performed as previously described [Shi R, Chiang VL (2005) Facile means for quantifying microRNA expression by real-time PCR. *Biotechniques* 39:519–525] by using forward primers 5'-TTCACAGTGGCTAAGTTCTGCAA-3' (miR-27b) and 5'-TTCACAGTGGGAAAGTTCTGCAA-3' (negative control primer, with two mutations underlined; miR-27bmut) along with a 3' adapter primer (3' RACE outer primer in the FirstChoice RLM-RACE kit, Ambion; 5'-GCGAGCACAGAATTAATACGAC-3') as the reverse primer. 5.8 sRNA was detected as a positive control by using primer 5'-ACGTCTGCCTGGGTGCACAA-3'. DNA ladder is shown.

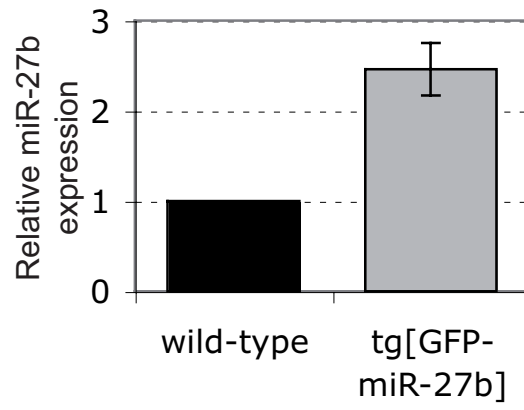

**Figure S3.** Increase in miR-27b expression in limb buds of tg[GFP-miR-27b] transgenic embryos, as assessed by qRT-PCR.

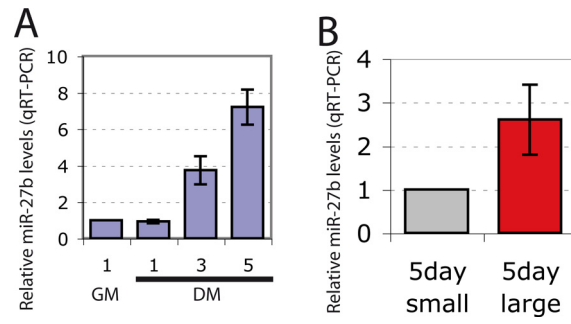

**Fig. S4.** miR-27b is up-regulated and maintained as myogenic cells differentiate. (A) qRT-PCR indicates mature miR-27b is up-regulated starting at 3 days after C2 cells are induced to differentiate by serum starvation. (B) *Pax3<sup>GFP/+</sup>* satellite cells were grown in culture for 5 days. After gentle trypsin treatment, cells were sorted between small undifferentiated cells and large, differentiated fibers. qRT-PCR indicates that mature miR-27b expression is maintained in the differentiated cell population.

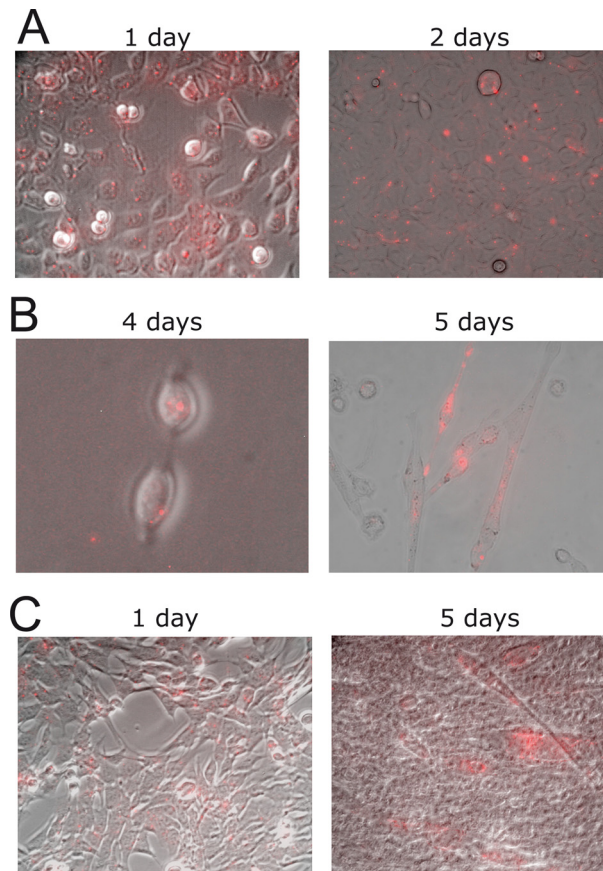

**Fig. S5.** Inhibitor molecules are stable in cell culture. Cy3-labeled control oligonucleotides (Ambion) were transfected into 293 cells (A), Pax3<sup>GFP/+</sup> satellite cells (B), and C2 cells (C). Cy3 fluorescence was observed at the indicated time points, corresponding to assay times used in cell culture systems employing these cell types.

**Table S1. The miR-27 target site on the Pax3 3'UTR is energetically accessible**

|        | Position | $\Delta G$ for 5'70 bp, kcal/mol | $\Delta G$ for 3'70 bp, kcal/mol | Structural elements |    |
|--------|----------|----------------------------------|----------------------------------|---------------------|----|
|        |          |                                  |                                  | SE                  | DS |
| miR-27 | 422      | 12.5                             | 12.3                             | None                | ML |

Although 70-bp sequences 5' and 3' to the target site have predicted free energies ( $\Delta G$ ) similar to the average for mouse 3'UTRs (13.4 kcal/mol), the 80-bp sequence that includes the target site has no stabilizing elements (SE), but rather a multiple loop (ML) destabilizing element (DS), indicating that the predicted target site is energetically accessible.
